# Supplementary material
Source: Springer Nature journal article supplement (https://www.springermedizin.de/resource/supplementary/12882_2013_920_MOESM2_ESM.pdf/9453964)

Hypertension (N=78,344)

eGFR  $\leq$  60 ml/min  
(N=21,985)

Proteinuria (N=20,574)

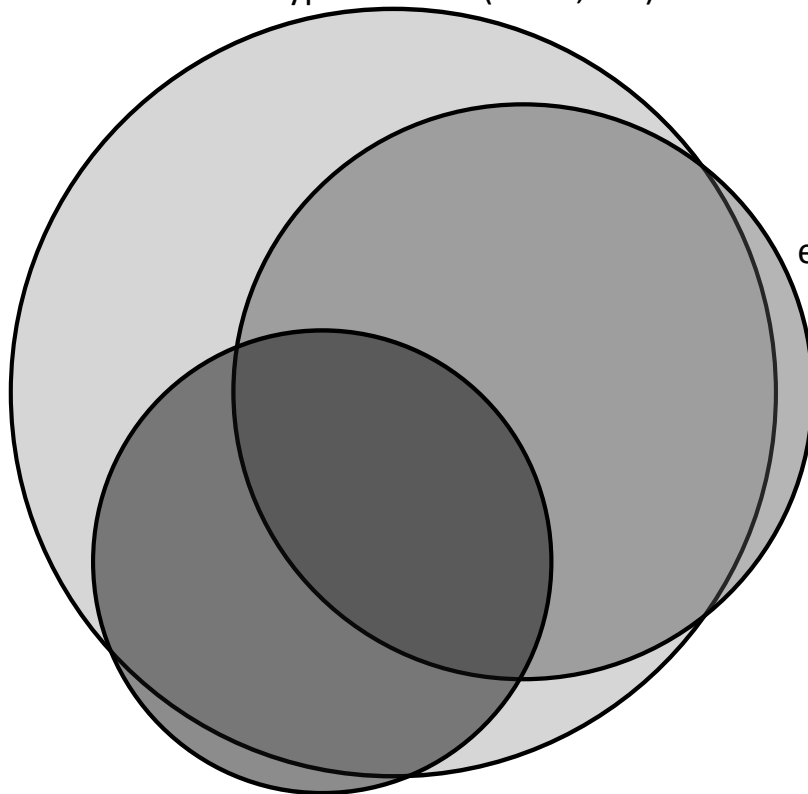

Supplement: MOESM2 [file 9453964]
